# Supplementary material for: Evaluation of Probiotic Properties of Pediococcus acidilactici M76 Producing Functional Exopolysaccharides and Its Lactic Acid Fermentation of Black Raspberry Extract
Source: MDPI journal article supplement (doi:10.3390/microorganisms9071364), 2021-06-23
Supplement: s1 [file s1]

## Supplementary Materials

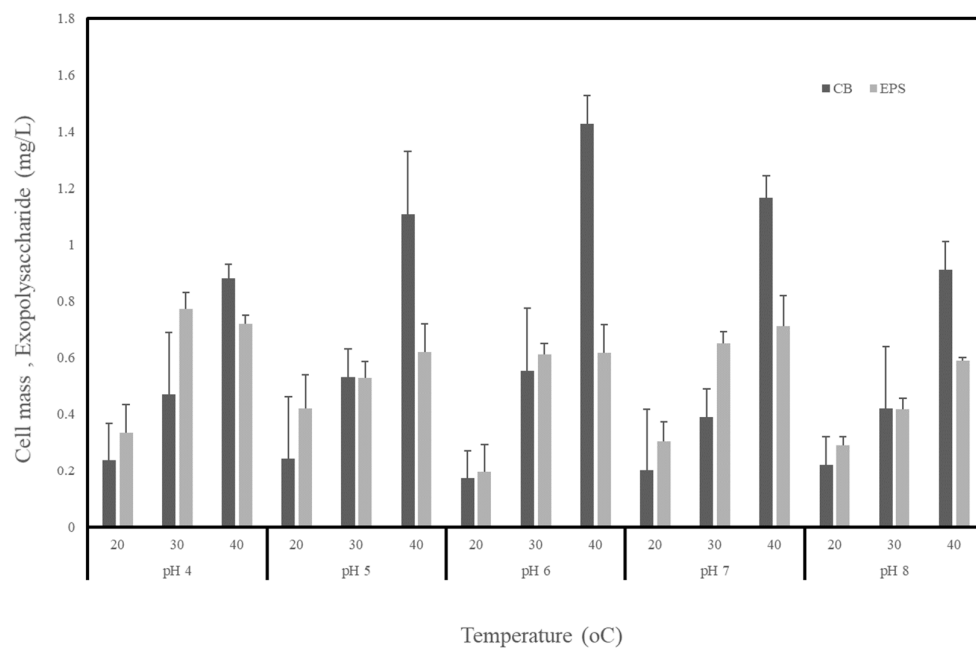

**Figure S1.** Cell mass and exopolysaccharide production of *Pediococcus acidilactici* M76 on at each pH and sugar concentration (°Brix).
